# Supplementary material for: Insights into the Origin of Nematode Chemosensory GPCRs: Putative Orthologs of the Srw Family Are Found across Several Phyla of Protostomes
Source: PubMed Central journal article supplement (PMC3963977; doi:10.1371/journal.pone.0093048), 2014-03-24
Supplement: pone.0093048.s002.pdf [file pone.0093048.s002.pdf]

Ag\_004829  
Dm\_Q7JVS8  
Dw\_B4MK79  
Am\_18473  
Ph\_309270  
Ag\_005229  
Ap\_002393  
Ph\_54050  
Am\_11463  
Dp\_P2838  
Ap\_41803  
Dp\_P22307  
Lg\_160192  
Lg\_114444  
Lg\_95120  
Lg\_105773  
Lg\_94839  
Lg\_124239  
Lg\_105511  
Lg\_153743  
Lg\_94475  
Sm\_149170  
CE37616  
CE17616  
CE16663  
PPA18494  
CE05989  
CE05989  
CE31892  
PPA01903  
CE04219  
Ap\_003290  
Ph\_10750  
Dp\_P2282  
Lg\_94766  
Lg\_139911  
Sm\_128710  
CE29619  
CE19503  
CE13668  
CE13666  
Sm\_056080

LCYILAPILCFPTYFVFTI - RQTOMI - - LFHLDT - - - - DENTIVYRYNFWIHSVVIKLL  
LPFILSPILCLPTYFVQV - RENSEA - MYHVFYF - - - - DKNSVLYRFNFWIHSVVIKLL  
FFFLISPLICLPYFVFKV - RETDEA - MFHYF - - - - DNNSLYRFNFWIHSVVIKLL  
SSFLAPFIACAPSYLVFQI - RKILEI - AYIVDA - DYS - QHKDFYQLNFWILGVVVKLL  
TSFVLPILICLPSYFVFI - KTAEIY - LYHLDLSDVAKENDQLL CNVTFWYGVLIKLL  
SSYVVCPLAVPIYLSFSI - QSRNVT - LYRLGTSQLV - RDNPALLNFWIYSVVFKLI  
LGYLVCPICIPSYLSFNL - FSRNVT - LYVNVSDLA - - TSTYALADINFWIYSVVIKLI  
STYVICPLICIPLYLYVTL - KTKNET - IYHVEA - - - - NNSPSMRDVNWIYGFVIKLL  
IAYIFCPLICIPLYITTEV - RKTNTT - LYFVRLTETA - ENHDILKELNFWIYSVVIKLF  
LAYSVSPVLCIPYLYTYTI - QEKNHT - LYVLTGSELARANDSLEENINFWTYSVVVKLI  
LSYLLPFIICSPFLVFEI - LETVAT - LYHGLSTIARVNHELLEYMINKLWYAYVIKLL  
MAYIGSVLLCIPSYFITFGI - QSTNFT - INHTQLSTPLQLPEAVIYKAHLWYASVVMKLG  
AIVGATILICLIPNYLMYTV - IDNMTS - CFWVVSSEIA - VRYPAYEMFVRWLFVVIKIL  
AVYILTMILCIPNYATNRI - EYINET - IYNPTV - - VTGEAADIKQTNSLIQAVLFKLL  
LVYLLTVVICIPNYIINA I - STKSDI - FYPVSL - RQSTADVFYQS NVYIQSILVKLI  
IVSFVTVVICIPNAVSYQI - VDGNGS - SWYVDV - KKTATEIILTRFNFWIQAMLVKLI  
VVYIFSIIVLIPNYLTNKI - QSRNNT - IYGLKDMTPKDPSTDKMALINTLLYAVVAKIV  
LVYFVTSVIMIPNYLTNEL - KPTNST - IFVLENLRGRNDTTPVLINWLYAIVAKLT  
VVYVLSVGLTIPNYITNKL - HPNET - VYIMESLDLGTNDVRPVLLNLWLYSIAKLL  
VICFASGLVMLPNYLYITGV - YETNGSTGMRYRLEFALGSKRPSVLLAFWLYAIVGKLL  
MTYIGSAILIIPNCFVTGI - HEHNGS - MYRLNSLSLT - NETSSMAILNFWVYVFGKII  
LITIFCIFAIPNILVNHS - ES - - - - - CLGPTLNYKSINGGIWN - - MKNIA  
GIYMVVFLCIPNMLVHEI - ARSNYSEPVYTFMVSHAATINNCRLFKWINWMIIGILFKII  
VYSVLSIVCLPTLVLHKI - YELSGQSIPKEVRYSLNFSYSCAFFKNLWMLAIVLKAII  
FIALFVFMCPVTLAHQI - DEMNGMYKY SVGFSTLMMQNGCSLMKGNLWLTGIFLKAII  
VVFMIIVATICLPTIYIHDV - QT - - - - - GFTYDFSSLAKSNTCRLKANLWLVIGIVLKV  
VTVSLVAVLNAIPNFLNYKI - NEWNSP - AYLPGIADIAKANSCLVRLSYWISGMVFKVL  
VTVSLVAVLNAIPNFLNYKI - NEWNSP - AYLPGIADIAKANSCLVRLSYWISGMVFKVL  
TTFIVVCLLNVPMMLTFEI - IEDDML - VYLV - - - - APSDHCGLNIAFWTNGVLFKVV  
LISFITLVVAVANYSASEF - LSNLDPV - - - - - FVAVPSADCPLYQLALWNTGLFFKVV  
IWIIPISLPLFFISEV - KIRDHV - AYDLQCYDLSYQESPLVSAFWAFGIVFKLL  
WISVMASLHQSTRFYDRTYEPIDSVVVCRMKHAYWVEHWVTLDVYFTLYYAFRVIFVHTG  
WIYVFATLHQSSRFDRTYTSPDVAVCKVNLATWVTDIVTEDVYFTVYCFRVVVFVHSL  
WIYVVALVHQFPRLFDQVYLPVGVVTTCKYEADWVTDIFSQVYYNLYFWFRVVCVHLG  
AIYVVALSQCTRFDYSYFVPRVTIGIEEHED - - WAMANLYMSIYYWFRVFLIHLI  
TIGAGSFIHSFALTLVKL - DS - - - - - VQVGSLAYTNTCAISQYEWTRAFLAQIL  
SAGIIGCLLCPMTFILYQC - ELINNDSTITNSLNSVTMTRNSDLHRINTNITTSNINLL  
VLCLPVFFIASTNLFLNYV - KE - KDENGLVELEVSPLSVANS CWYMKFALVLSGSLFKII  
ALCAPVFLITTFILFMNVV - KN - - TEEEGIHLDISDLSLSECLFLKIYFIARNTIFPIA  
ALCAPVFLIATFVLFINAV - KN - - TEEEGIYLDISDLSLSECLFMKASLMASGLCFKIA  
AVYITVLTVSTLIVPVNEV - KK - - TDDGEVYIDTSDFSLAYGCLMKIVLVFVVICFKLI  
IISCLAITLHWPRFILFQPIQLANSVQCLWNIVYNLPNIVMKCHLMIIFYFYARIILIHIL

Ag\_004829  
Dm\_Q7JVS8  
Dw\_B4MK79  
Am\_18473  
Ph\_309270  
Ag\_005229  
Ap\_002393  
Ph\_54050  
Am\_11463  
Dp\_P2838  
Ap\_41803  
Dp\_P22307  
Lg\_160192  
Lg\_114444  
Lg\_95120  
Lg\_105773  
Lg\_94839  
Lg\_124239  
Lg\_105511  
Lg\_153743  
Lg\_94475  
Sm\_149170  
CE37616  
CE17616  
CE16663  
PPA18494  
CE05989  
CE05989  
CE31892  
PPA01903  
CE04219  
Ap\_003290  
Ph\_10750  
Dp\_P2282  
Lg\_94766  
Lg\_139911  
Sm\_128710  
CE29619  
CE19503

PCTILPVI SCVLIQVLWKA SKRR - LK LKQGRPPR TDRRA DR T T L L V AV L L L F L F T E F P Q  
PCGILTVI SAVLMHVLC EASRRR - LK LRDYKPPR CDRRN DR T T L L L V AV L L L F L I T E F P Q  
PCILTLIISLVLMHVLC EASRRR - LK LKDYRPPR CDRRN DR T T L L L V AV L L L F L V T E F P Q  
PCVILTVI SCWLKALYRA KGRK - QALKSYPSPK SERRA DR T T KMLV AV L L L F L V T E I P Q  
PCVILTVI SIRLIKALY EINKRN - KLLKTARVILAKERT DR T T RMLV A I L I L F L L T E L P Q  
PCIALTILSLRIGALL EAKQRR - SQLTGTKQTD KEK Q T DR T T RML AV L L L F L I T E F P Q  
PCVALTVLSLRLICALLEAKRRR - AKLTGSKSADKER Q T DR T T RML AV L L L F L I T E F P Q  
PCILLTFLSFRMVLFLIKNEKRQ - KLLISSNQTYREK QSHRA T KMLL VVLIL FLITESPQ  
PCLVLTIVSLKLLQVLEAKRRR - RKLTNIRRADKER Q T DR T T MML AV L L L F L L T E L P Q  
PCVALTFFSFRLISALVSAKERR - QNLKPSNRHNTGSEKHDR T T RML AV L L L F L V T E F P Q  
PCILLTVVTISLINALVSA SERKAKRRLPTQRNMK LKRRMDRTSRIMIAVLLFLATEFPQ  
PCLVLTVLT CWLVRRLWEA ERHH - QSLTANNRRKLSHQ T DR T T RMLV AV L L L F L V T E I P Q  
PCILLTVLSTLIIIAMHEAKRRR - SRL LGMDHDNASS EHNRT T MMLV L V V L T F V I T E L P Q  
PCAMLTTLTILLIHAMHKA YRKR - MRLKSQAESDKHG EHNRT T GML AV V L F T L T E L P Q  
PCFLLTTLTILLIHAMHKA YRKR - MRLKSQAESDKHG EHNRT T GMLA I V V L F M L T E L P Q  
PCFLLTILSILLVKTMKDA EKRR - KKL LSKDDPRRPSKTNR T T RML AV V I L F L V T E I P Q  
PCLLSIFSVSLVYTIHYKNRHRMRRLVAAKSRAISKQTT T RMLL V V I V L F L I T E L P Q  
PCLLITVFGCMLLYQMQLVQKRR - RSI IAKTSGIKLKEHSR T T KML I S V I V L F I V T E F P Q  
PCILMVIYGGLLLYTLKSKVLFQ - KRKLSCVYA Q RPLDNSR T RML I V I I L F L V T E L P Q  
PCVLISVFMGFLKRLHES TERR - RRL FSTSKK RAGHKS T T T M L L V I I L V I V T E L P Q  
PCVLISIFGGFLLHTLRES DRRG - SRLKGD - - - KCHAHRRT T LMLL AV I V M Y I S E V P Q  
PSFLLTILLTILLISELQKAIKRR - KALFIHDESKLSENR T T ALL T I V L C F L V I E L P Q  
PCILLIFLSFGLLSKIRDA EKHR - RKLTSVPLKKNGTSDR T T LMLV I L L V F L I T E F P Q  
PCALLLWFTIALVVKLR Q TDEKR - NYL YSKKHVKKTTPV DR T T YML I I M L V V F L V T E L P Q  
PCLLLTFTIALINRLRENNEKR - KIL I - - KEERAKKR GDF T T YML L L M V T V F L F T E L P Q  
PCCLLFAFTTFLMLLLKESNDRR - MMLFVSSIRRRNRTY DR T T LTLV VMLT I F V L T E F P Q  
PCALLSLFVWLLRILREVREN - QRLKNSLRGRGERVDR T THMLL A I V A V M L V T E L P Q  
PCALLSLFVWLLRILREVREN - QRLKNSLRGRGERVDR T THMLL A I V A V M L V T E L P Q  
PCLLLTFSIVALVSIIRDVGKRR - KQLAQV - - KKRMPRDH T T PMLV AVLS I F L F A E L P Q  
PCAMLTVSI I A L L K I I S D V A H R R - RSLAQL - - - KKKVPRDH T T PMLV AVLS I F L L A E F P Q  
PCLILSILLIALIRLSKSVERRR - KNWKRTKAKRKL TTRPR T T RMLV I I L L C V M V E L P M  
PCISLVVLLNLLFRAMRDAQLKR - DKLFKENECKRLRDS NCT T LML I V V V T V F L M T E I P L  
PCVSLVVLNLLFRAMRAAQLKR - KE LFK E C E S K K I R D S N C T T L M L I V V V T V F L A V E I P L  
PCASLVLLNLLFGALRRAQQR - DKLFKESCKRLRDS NCT T LML I V V V S C F L V E I P L  
PCIFLVVMNALLIYAMRVAQVRR - MOLRQSESKLKDS NCT T LMLV AVVGL F L L V E F P L  
PCVILGIFNLLLRITIKGYRYR - RRLVRGAQNR ELRTTLRMS IML I L I T G S T L L A E T F V  
STVTTT T T T F L Q I S S L A P S N E L R N N E L N N S R L L Q K S R E S O H V T I M L I I I V I S F V I T E A P Q  
PCILMSGLSIVILGKINAGKQRA - IALSRSS - - DNTQSKIDRSSRFIQCIIIFVVFTEFPQ  
PCVLMILLSFTLLKKFD E GK R S A - QNAAAS - - - GK K D K I D R S S R F I Q F V L V I F L I T E S P Q

CE13668  
CE13666  
Sm\_056080

P C L L M L V L S L F L L R R I D E G K Q S A - Q N A A A N - - - G K K D K I D R S S R F I Q F V L V V F L I T E S P Q  
P C T L M L I L S I L L L Q K M D E G K R S S - V P I N R N - - - K R V D Q L D R S S Q L I Q T I L I V F L I T E V P Q  
P C G I L I A L T I I L V I K M H N I I K L R - K R L G L R T T K K S S I N P Q A I S R M L I V V L I K F I A M H L P N

Ag\_004829  
Dm\_Q7JVS8  
Dw\_B4MK79  
Am\_18473  
Ph\_309270  
Ag\_005229  
Ap\_002393  
Ph\_54050  
Am\_11463  
Dp\_P2838  
Ap\_41803  
Dp\_P22307  
Lg\_160192  
Lg\_114444  
Lg\_95120  
Lg\_105773  
Lg\_94839  
Lg\_124239  
Lg\_105511  
Lg\_153743  
Lg\_94475  
Sm\_149170  
CE37616  
CE17616  
CE16663  
PPA18494  
CE05989  
CE05989  
CE31892  
PPA01903  
CE04219  
Ap\_003290  
Ph\_10750  
Dp\_P2282  
Lg\_94766  
Lg\_139911  
Sm\_128710  
CE29619  
CE19503  
CE13668  
CE13666  
Sm\_056080

G I L G L M S G I L E F F R R C Y G L F G E V M D L L A L I N A A I G F V L Y G L M S K Q F R T S F K S V F  
G L L G L L S G V M E F F A H C Y P P F G E L M D L L A L I N A A V G F V L Y G L M S K Q F R T T F R S L F  
G L L G L L S G I L K F F E H C Y P P F G E I V D L L A L I N A A V G F V L Y G F M S K Q F R T T F R S L F  
G I L G L L S G V L G F F R N C Y H N F G E V M D I L A L L N G A I N F I L Y C S M S R Q F R T T F G Q L F  
G I L G L L S G I L G F F R N C Y N L F G E I M D I L A L V N S A I N F I L Y C F M S R Q F R Q T F E K V F  
G I L G L L S A V L K F F F N C Y L K L G D V M D V L A L V N S A I N F I L Y C S M S R Q F R S T F N D L F  
G I L G L L T L L L G F F Q D C Y Q N M G E V M D M L A L V N S A I N F I L Y C V M S R Q F R N T F S L L F  
G I L G L S Y S L G F Y N S C Y H P L G D V L D F L A L F N S S T N F M I Y C T M S R Q F R V T F N L L F  
G I L G L S V L L G F F K A C Y L M L G D V I D M L T L V N S A I N F I L Y C T M S R Q F R K T F N E L F  
G I L A L L S G I L G F F T N C Y R H L G E L T D I L A L I N G A I N F L L Y C V M S R Q F R Q T F S R I F  
G I L G L L S G I L G F F Q T C Y S L F G E L M D M L A L L N A S L N F V F Y C C M S K Q F R V A F G Q L F  
G V M A L L S G V L G F F I K C Y S T M G E I L D L L A L L N S A I N F L L Y C S M S R Q F R - - - - -  
G I L G L S A V - N F F S R V Y V N L G D L M D L L V L I N S A V N F I L Y C I M S Q Q F R N T F K S L F  
G I L T L M N I F I - F Q W Y V Y D K L G D L I D T M A L M N N S I N F V L Y C S M S K Q F R D T F T E I F  
G I L T L M T L F - E L Q F Y V Y N N L G D L V D V M A L I N N S I N F V L Y C T M S K Q F R D T F V K V F  
G I L N L I S G I - E F F D N V Y T P L G D L M D I L A L I N N G I N F I L Y C T M S K Q F R D T F I K L F  
G I L G L S A A I - F H N N V Y N L L G D L M D F I A L L N N A I N F V L Y C S M S Q Q F R S T F I E M Y  
G I L I V L S A C - K F F E T V Y L P L G D I M D I V A L V N N A V N F V L Y C T M S T K F R E T F L R Q Y  
G I L I I L S V T - S F F H F I Y M P L G D L M D M M A L I N N G V N F I L Y C S M S R D F R L T L M D L L  
S V L V I L S V I - F F F E N V Y Y L L A D I L D M A A L I N N A I N F V L Y C I M S Q Q F R G H L M E M W  
S I L V L C A V - V F F V D V Y L P L S D L I D A I A L I N S A I N F V M Y C T M S Q Q F R - - - - -  
G I L V T C I H L - I F E E K V Y Q H L G D L L D F L T L L N E S I S F I I Y T T M S N Q F R Q T F C N I F  
G I I S I L C A I F T V H R Y L Y F Y I G D V L D L L S L V N S S V N F V L Y C V M S S R Y R Q T F W E V I  
G F L A L L N G L Y T V N I Y I Y K N L S E L L D F L S L I N C S V D F L L Y C V M S S R Y R Q T F G H M L  
G I M A I L N A L F T F H Q M V Y L N L A D V L D L L S L I N C Y V A F L V Y S F T S S R Y R Q T L F S L L  
G M V A V L N G V Y T V Y N H I Y S I F G D M L D L L S L I N C Y V G F I A Y G F L C S K Y R Q T F V M L M  
G I M A V L S G M C S F R I Y I Y N N L G D I L D L F S L C G S C C S F I I Y C S M S G Q F R N E F H R V F  
G I M A V L S G M C S F R I Y I Y N N L G D I L D L F S L C G S C C S F I I Y C S M S G Q F R N E F H R V F  
G V L H V F N A I F T F Y D K I Y I H L G D V M D V L S L L N S A V N F I I Y C A M S R K F R A V F I Q I F  
G V L H I G K V V F T F H Q Q I Y Q P L G N V M D L L S L V N S A V N F I I Y C A M S R N K L Q Y G A D F D  
G I L N L C V A I Y G F G N R Y Y D P V G N L M E M L T L L Y S S V S F V L Y C T M S N E Y L S T F R A L F  
A V V T V L H I I S S L D Y S V A N L L V L F T N F F I I V S Y P I N F A I Y C G M S R Q F R E T F K E L F  
A V I T V L H I I S S L D Y N I A N V L I L F S N F F I I V S Y P I N F A I Y C G M S R Q F R E T F K E L F  
A V L T V L H I F D A L D Y S V I N V L I L F T N F F I S L S Y P I N F A I Y C G M S R Q F R E T F Q G L F  
G I I M I L L I V S N I S K E T F Q I L S I F S N L F I L L S Y P F N F F I Y C G M S K Q F R E T F K R L F  
A I L L I I Q T S Q E A D P T N V S K S M V I S N F L I L F T F P L N F L F Y F L M S S R F R R H F V N C Y  
G V F N A L V A I K G F L H T I Y L P L G D L L D L L V L L N S S T N F I L Y C A M S Q V F R V N F V N L L  
G F F S V V G G L S I - Y I N Y F Q F S V F T N L L A Y F N T T T S F I I Y S T L S S K F R K L F V Q L F  
G V F K I L S G I M M - Y I N Y F Q N L T I F I N I L A F F N S T T S F I I Y S S L S A K F R K I F A Q L F  
G V F S I L G G F M I - Y I N Y F Q N L S I F M N I L A F F N T T T S F I I Y S S L S A K F R R I F A Q L F  
G V F S I I G G I E V - Y L N Y Y Q N L T I F M N V L S F F N T T T S F I I Y S S L S A K F R R I F A Q T F  
A I V L T I I Y V L R K L I D D Y L G K A V I L C N L V I L V S Y Q L N F V I Y Y V M S T Q F K E T F N N L C
