# Supplementary material for: Insights into the Origin of Nematode Chemosensory GPCRs: Putative Orthologs of the Srw Family Are Found across Several Phyla of Protostomes
Source: PubMed Central journal article supplement (PMC3963977; doi:10.1371/journal.pone.0093048), 2014-03-24

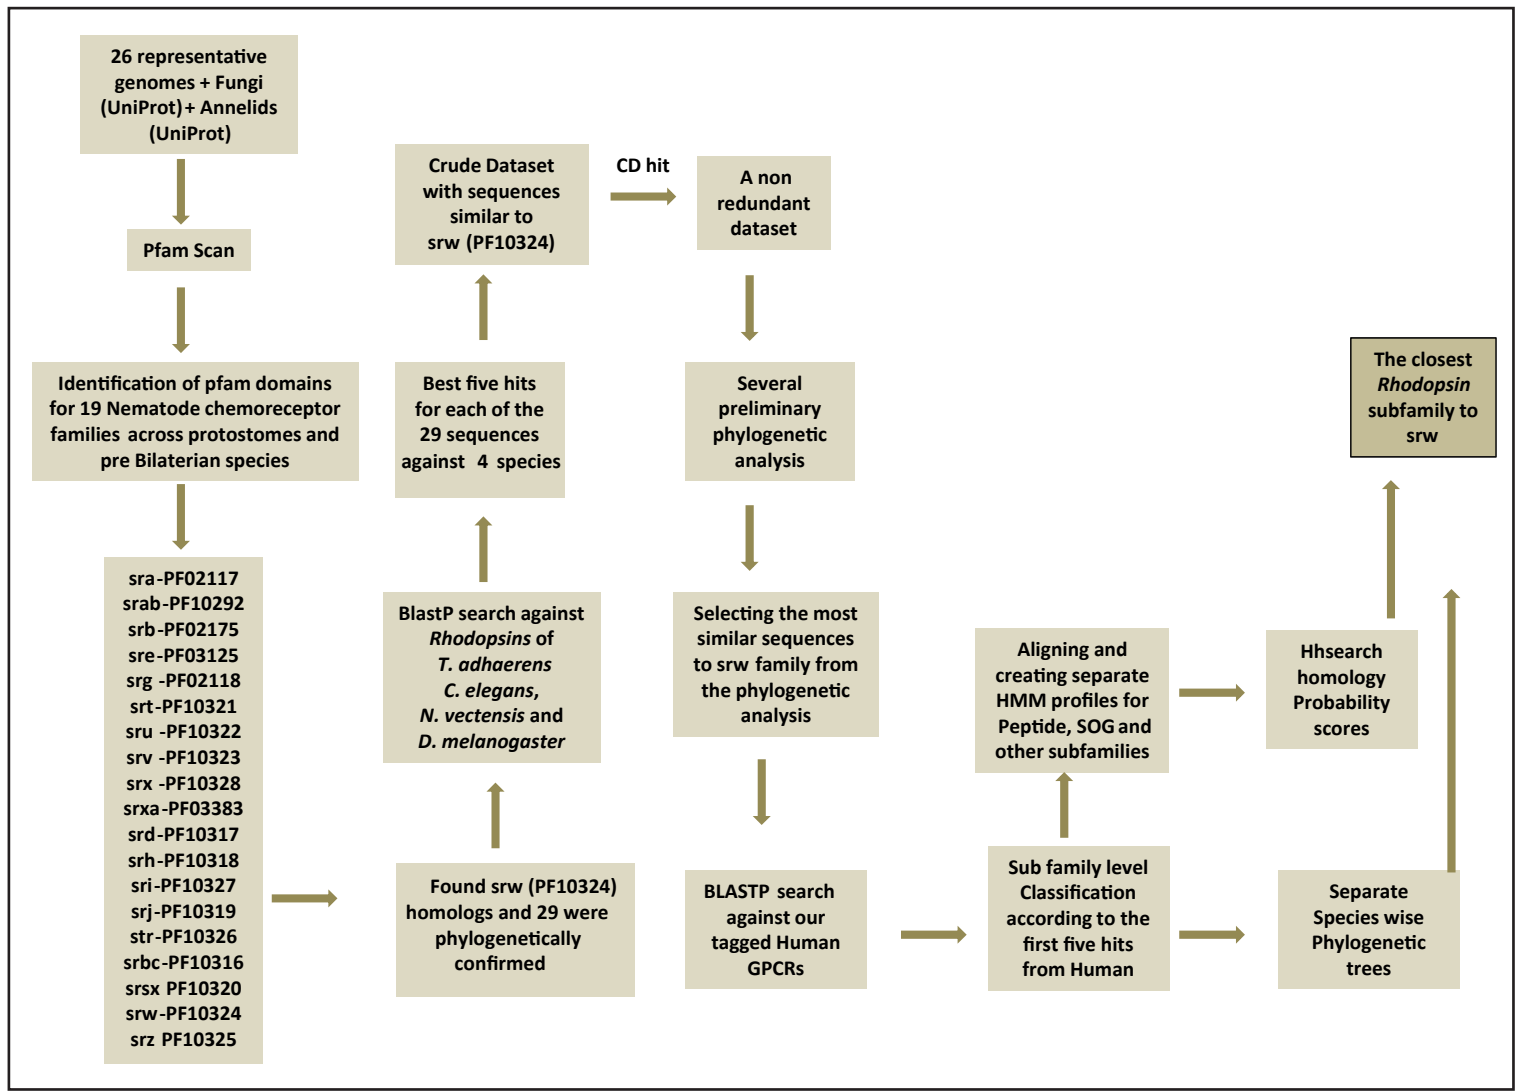

Supplement: pone.0093048.s003.pdf [file pone.0093048.s003.pdf]
