# Supplementary material for: Insights into the Origin of Nematode Chemosensory GPCRs: Putative Orthologs of the Srw Family Are Found across Several Phyla of Protostomes
Source: PubMed Central journal article supplement (PMC3963977; doi:10.1371/journal.pone.0093048), 2014-03-24
Supplement: pone.0093048.s004.pdf [file pone.0093048.s004.pdf]

| Query               |                                 | 1                             | 2                              | 3                              | 4                              | 5                                |
|---------------------|---------------------------------|-------------------------------|--------------------------------|--------------------------------|--------------------------------|----------------------------------|
| Superfamily         | <i>Sra</i>                      | sra (96.7; 1.8E-08)           | <b>srb (75.4; 0.0013)</b>      |                                |                                |                                  |
|                     | srab                            | sra (96.7; 1.9E-08)           | srb (96.1;1.5E-07)             | sre (90.5;7.4E-05)             |                                |                                  |
|                     | srb                             | srab (96.2; 1.3E-07)          | <b>sra (75.8; 0.0013)</b>      |                                |                                |                                  |
|                     | sre                             | srab (90.4;7.5E-05)           | <b>sra (28.1; 0.034)</b>       |                                |                                |                                  |
| Superfamily         | <i>Str</i>                      | str (98.5; 1.1E-13)           | srj (98.2; 2.7E-12)            | srh (96.8; 1.1E-08)            | sri (96.0; 2.3E-07)            |                                  |
|                     | srh                             | sri (99.1; 5E-17)             | str (97.2; 1.5E-09)            | srd (96.8; 1.1E-08)            | srj (94.0; 8E-06)              |                                  |
|                     | sri                             | srh (99.1; 6.8E-17)           | srd (96.0; 2.5E-07)            | str (94.8; 2.7E-06)            | srj (94.8; 2.8E-06)            |                                  |
|                     | srj                             | str (99.8; 1.4E-27)           | srd (98.2; 2.9E-12)            | sri (94.8; 2.8E-06)            | srh (93.9; 8.4E-06)            |                                  |
|                     | str                             | srj (99.8; 1.3E-27)           | srd (98.5; 1.3E-13)            | srh (97.2; 1.1E-08)            | sri (94.8; 2.6E-06)            |                                  |
| Superfamily         | <i>Srg</i>                      | srv (96.4; 5.8E-08)           | sru (90.4; 7.5E-05)            | <b>srx (32.5; 0.025)</b>       |                                |                                  |
|                     | sru                             | srg (90.2; 8.3E-05)           |                                |                                |                                |                                  |
|                     | srv                             | srg (96.4; 6.7E-08)           | srx (87.2; 0.00021)            |                                |                                |                                  |
|                     | srx                             | srv (87.4; 0.0002)            | <b>Nv_Amin (77.4; 0.0011)</b>  | <b>srt (76.8; 0.0011)</b>      | <b>Ce_Pep (74.5; 0.0014)</b>   | <b>Ta_Amin 73.(73.8; 0.0015)</b> |
|                     | srt                             | <b>srx (76.6; 0.0012)</b>     | <b>srv (13.2; 0.12)</b>        |                                |                                |                                  |
|                     | srxa                            | <b>srx (18.4; 0.07)</b>       |                                |                                |                                |                                  |
| Individual families | srbc                            | <b>Ce_Pep (18.4; 0.07)</b>    | <b>srsx (14.3; 0.1)</b>        | <b>srx (13.6; 0.11)</b>        |                                |                                  |
|                     | srsx                            | <b>Ce_Pep (95.7; 5.4E-07)</b> | <b>Nv_Amin (95.6; 6.7E-07)</b> | <b>Ta_Pep (92.1; 3.3E-05)</b>  | <b>Dm_pep (92.0; 3.6E-05)</b>  | <b>Nv_pep (89.8; 9.7E-05)</b>    |
|                     | srw                             | <b>Ce_Pep (95.6; 6.4E-07)</b> | <b>Dm_Sog (93.3; 1.5E-05)</b>  | <b>Dm_Pep(92.9; 2E-05)</b>     | <b>Nv_Pep (64.4; 0.0034)</b>   | <b>Nv_Sog (26.5; 0.038)</b>      |
|                     | srz                             | No hits                       |                                |                                |                                |                                  |
| Ag_srw              | No hits other than srw families |                               |                                |                                |                                |                                  |
| Ac_srw              | <b>Ce_Pep (96.0;2.3E-07)</b>    | <b>Dm_pep (95.6; 5.9E-07)</b> | <b>Nv_pep (91.2; 5.3E-05)</b>  | <b>Nv_Amin (87.7; 0.00019)</b> | <b>Nv_sog (87.0; 0.00022)</b>  |                                  |
| Ap_srw              | <b>Ce_Pep (96.9;1E-08)</b>      | <b>Ce_Sog (96.6; 3.4E-08)</b> | <b>Dm_Pep (96.4; 6.2E-08)</b>  | <b>Nv_pep (94.4; 4.5E-06)</b>  | <b>Nv_sog (92.8; 2.1E-05)</b>  |                                  |
| Dp_srw              | <b>Ce_Pep (97.9;2E-11)</b>      | <b>Dm_Pep (97.8; 4.2E-11)</b> | <b>Ce_Sog (97.8; 5.3E-11)</b>  | <b>Nv_pep (96.6; 2.8E-08)</b>  | <b>Ta_Pep (96.1; 1.5E-07)</b>  |                                  |
| Dros_srw            | <b>Ce_Pep (97.2; 2.5E-09)</b>   | <b>Dm_Pep (96.4; 6.6E-08)</b> | <b>Ce_Sog (95.4; 9.5E-07)</b>  | <b>Ce_Amin (92.8; 2.2E-05)</b> | <b>Nv_pep (92.6; 2.4E-05)</b>  |                                  |
| Am_srw              | <b>Dm_Pep (95.2; 1.4E-06)</b>   | <b>Ce_Sog (95.1; 1.6E-06)</b> | <b>Ce_Pep (94.9; 2.3E-06)</b>  | <b>Ce_Amin (90.1; 8.6E-05)</b> | <b>Nv_pep (65.8; 0.0031)</b>   |                                  |
| Lg_srw              | <b>Ce_Pep (98.5; 1.1E-13)</b>   | <b>Dm_Pep (98.4; 3.9E-13)</b> | <b>Ce_Sog (98.1; 5.8E-12)</b>  | <b>Nv_pep (97.3; 1.3E-09)</b>  | <b>Nv_sog (96.9; 8.2E-09)</b>  |                                  |
| Ph_srw              | <b>Ce_Pep (97.5; 4.2E-10)</b>   | <b>Ce_Sog (97.4; 5.4E-10)</b> | <b>Nv_pep (96.9; 8.7E-09)</b>  | <b>Dm_Pep (96.8; 1.6E-08)</b>  | <b>Nv_Amin (95.6; 6.4E-07)</b> |                                  |
| Pp_srw              | <b>Ce_Sog (55.1; 0.0064)</b>    | <b>Ce_Pep (52.0; 0.0078)</b>  | <b>Dm_Pep (21.7; 0.054)</b>    |                                |                                |                                  |
| Sm_srw              | <b>Ce_Pep(48.8; 4.2E-10)</b>    | <b>Dm_Pep (32.2; 0.026)</b>   | <b>Ce_Sog (26.0; 0.039)</b>    |                                |                                |                                  |
